# Supplementary material for: Sensitive quantification of Clostridium perfringens in human feces by quantitative real-time PCR targeting alpha-toxin and enterotoxin genes
Source: PubMed Central journal article supplement (PMC4615878; doi:10.1186/s12866-015-0561-y), 2015-10-19
Supplement: 12866_2015_561_MOESM1_ESM.pdf [file 12866_2015_561_MOESM1_ESM.pdf]

**Supplementary Table S1** Standard curve information

| Target        | Primer name   | Ampdirect® plus | Analytical curve | Correlation coefficient | Detection limit (log <sub>10</sub> cells/reaction) | C <sub>q</sub> value for LOD | C <sub>q</sub> value for NTC | PCR efficiency |
|---------------|---------------|-----------------|------------------|-------------------------|----------------------------------------------------|------------------------------|------------------------------|----------------|
| <i>plc</i>    | Cper-plc508-F | +               | y= -3.4x + 36.8  | 0.9999                  | 0                                                  | 36.7                         | >50                          | 0.95           |
|               | Cper-plc508-R | -               | y= -3.3x + 31.7  | 0.9981                  | 0                                                  | 31.7                         | 40.0                         | 1.03           |
| <i>cpe</i>    | GAP11         | +               | y= -3.4x + 38.5  | 0.9993                  | 0                                                  | 38.7                         | >50                          | 0.98           |
|               | GAP12         | -               | y= -3.5x + 34.8  | 0.9995                  | 0                                                  | 34.7                         | >50                          | 0.94           |
| 16S rRNA gene | s-Clper-F     | +               | y= -3.4x + 34.9  | 0.9962                  | 0                                                  | 35.3                         | >50                          | 0.97           |
|               | CIPER-R       | -               | y= -3.2x + 30.3  | 0.9940                  | 0                                                  | 30.6                         | 45.2                         | 1.06           |
