# Supplementary material for: Sensitive quantification of Clostridium perfringens in human feces by quantitative real-time PCR targeting alpha-toxin and enterotoxin genes
Source: PubMed Central journal article supplement (PMC4615878; doi:10.1186/s12866-015-0561-y), 2015-10-19
Supplement: 12866_2015_561_MOESM2_ESM.pdf [file 12866_2015_561_MOESM2_ESM.pdf]

**Supplementary Table S2** Quantitative data of *C. perfringens* count in stool samples from healthy infants and young adults by Amp-qPCR

assays targeting 16S rRNA, *plc* and *cpe* genes

| Infant data (n=124) |            |                                                 |                                |                                | Adult data (n=221) |            |                                                 |                                |                                |
|---------------------|------------|-------------------------------------------------|--------------------------------|--------------------------------|--------------------|------------|-------------------------------------------------|--------------------------------|--------------------------------|
| S. No.              | Sample ID. | Bacterial count (Log10 bacterial cells/g feces) |                                |                                | S. No.             | Sample ID. | Bacterial count (Log10 bacterial cells/g feces) |                                |                                |
|                     |            | Amp-qPCR count                                  |                                |                                |                    |            | Amp-qPCR count                                  |                                |                                |
|                     |            | <i>C. perfringens</i> 16S rRNA gene             | <i>C. perfringens plc</i> gene | <i>C. perfringens cpe</i> gene |                    |            | <i>C. perfringens</i> 16S rRNA gene             | <i>C. perfringens plc</i> gene | <i>C. perfringens cpe</i> gene |
| 1                   | 1047       | <3.1                                            | <3.1                           | <3.1                           | 1                  | 7-3 (1)    | <3.1                                            | <3.1                           | <3.1                           |
| 2                   | 1097       | <3.1                                            | <3.1                           | <3.1                           | 2                  | 8-3 (2)    | <3.1                                            | <3.1                           | <3.1                           |
| 3                   | 1100       | 7.2                                             | 6.9                            | <3.1                           | 3                  | 9-3 (3)    | 4.7                                             | 4.8                            | <3.1                           |
| 4                   | 1107       | <3.1                                            | <3.1                           | <3.1                           | 4                  | 10-3 (4)   | <3.1                                            | <3.1                           | <3.1                           |
| 5                   | 1108       | <3.1                                            | <3.1                           | <3.1                           | 5                  | 11-3 (5)   | 7.7                                             | 7.8                            | <3.1                           |
| 6                   | 1109       | 4.4                                             | 4.3                            | <3.1                           | 6                  | 12-3 (6)   | <3.1                                            | <3.1                           | <3.1                           |
| 7                   | 1112       | <3.1                                            | 3.2                            | <3.1                           | 7                  | 16-3 (7)   | <3.1                                            | <3.1                           | <3.1                           |
| 8                   | 1115       | 6.4                                             | 6.1                            | 3.8                            | 8                  | 17-3 (8)   | 7.7                                             | 8.1                            | <3.1                           |
| 9                   | 1119       | 4.3                                             | 3.9                            | 4.2                            | 9                  | 18-3 (9)   | <3.1                                            | <3.1                           | <3.1                           |
| 10                  | 1121       | <3.1                                            | <3.1                           | <3.1                           | 10                 | 20-3 (10)  | <3.1                                            | <3.1                           | <3.1                           |
| 11                  | 1122       | 7.6                                             | 7.3                            | <3.1                           | 11                 | 22-3 (11)  | <3.1                                            | <3.1                           | <3.1                           |
| 12                  | 1124       | <3.1                                            | <3.1                           | <3.1                           | 12                 | 1-3        | <3.1                                            | <3.1                           | <3.1                           |
| 13                  | 1129       | <3.1                                            | <3.1                           | <3.1                           | 13                 | 2-3        | <3.1                                            | <3.1                           | <3.1                           |
| 14                  | 1131       | <3.1                                            | <3.1                           | <3.1                           | 14                 | 3-3        | <3.1                                            | <3.1                           | <3.1                           |
| 15                  | 1133       | 7.2                                             | 6.9                            | <3.1                           | 15                 | 4-3        | <3.1                                            | <3.1                           | <3.1                           |
| 16                  | 1149       | <3.1                                            | <3.1                           | <3.1                           | 16                 | 5-3        | <3.1                                            | <3.1                           | <3.1                           |
| 17                  | 1150       | <3.1                                            | <3.1                           | <3.1                           | 17                 | 6-3        | <3.1                                            | <3.1                           | <3.1                           |
| 18                  | 1154       | <3.1                                            | <3.1                           | <3.1                           | 18                 | 7-3        | <3.1                                            | <3.1                           | <3.1                           |
| 19                  | 1155       | <3.1                                            | <3.1                           | <3.1                           | 19                 | 8-3        | <3.1                                            | <3.1                           | <3.1                           |
| 20                  | 1164       | 3.6                                             | 3.5                            | <3.1                           | 20                 | 9-3        | <3.1                                            | <3.1                           | <3.1                           |
| 21                  | 1172       | 7.7                                             | 7.4                            | 8.4                            | 21                 | 10-3       | 3.1                                             | 3.6                            | <3.1                           |

|    |      |      |      |      |    |         |      |      |      |
|----|------|------|------|------|----|---------|------|------|------|
| 22 | 1174 | <3.1 | <3.1 | <3.1 | 22 | 1211025 | <3.1 | <3.1 | <3.1 |
| 23 | 1179 | <3.1 | <3.1 | <3.1 | 23 | 1211026 | <3.1 | <3.1 | <3.1 |
| 24 | 1180 | <3.1 | <3.1 | <3.1 | 24 | 1211027 | <3.1 | <3.1 | <3.1 |
| 25 | 1181 | 7.1  | 6.8  | <3.1 | 25 | 1211028 | 3.8  | 3.4  | <3.1 |
| 26 | 1183 | <3.1 | <3.1 | <3.1 | 26 | 1211029 | 4.2  | <3.1 | <3.1 |
| 27 | 1184 | <3.1 | <3.1 | <3.1 | 27 | 1211031 | 3.9  | 3.7  | <3.1 |
| 28 | 1186 | 4.9  | 4.2  | <3.1 | 28 | 1211032 | <3.1 | <3.1 | <3.1 |
| 29 | 1188 | <3.1 | <3.1 | <3.1 | 29 | 1211034 | <3.1 | <3.1 | <3.1 |
| 30 | 1193 | <3.1 | <3.1 | <3.1 | 30 | 1211035 | <3.1 | 3.2  | <3.1 |
| 31 | 1196 | <3.1 | <3.1 | <3.1 | 31 | 1211036 | 3.3  | 3.8  | <3.1 |
| 32 | 1204 | 5    | 4.7  | 5    | 32 | 1211038 | <3.1 | <3.1 | <3.1 |
| 33 | 1208 | 7.3  | 7.0  | <3.1 | 33 | 1211098 | <3.1 | <3.1 | <3.1 |
| 34 | 1209 | 6.7  | 6.4  | 6.8  | 34 | 1211040 | <3.1 | <3.1 | <3.1 |
| 35 | 1215 | 7.7  | 7.5  | <3.1 | 35 | 1211041 | 5.0  | 5.4  | <3.1 |
| 36 | 1216 | <3.1 | <3.1 | <3.1 | 36 | 1211042 | 5.2  | 3.5  | <3.1 |
| 37 | 1218 | 7.1  | 7.1  | 7.8  | 37 | 1211043 | <3.1 | 3.5  | <3.1 |
| 38 | 1220 | 7.2  | 7.0  | <3.1 | 38 | 1211044 | 4.3  | 4.3  | <3.1 |
| 39 | 1223 | <3.1 | <3.1 | <3.1 | 39 | 1211046 | <3.1 | <3.1 | <3.1 |
| 40 | 1226 | <3.1 | <3.1 | <3.1 | 40 | 1211047 | <3.1 | <3.1 | <3.1 |
| 41 | 1227 | <3.1 | <3.1 | <3.1 | 41 | 1211048 | <3.1 | <3.1 | <3.1 |
| 42 | 1228 | <3.1 | <3.1 | <3.1 | 42 | 1211050 | <3.1 | <3.1 | <3.1 |
| 43 | 1230 | <3.1 | <3.1 | <3.1 | 43 | 1211051 | <3.1 | <3.1 | <3.1 |
| 44 | 1231 | <3.1 | <3.1 | <3.1 | 44 | 1211053 | <3.1 | <3.1 | <3.1 |
| 45 | 1248 | 7    | 6.4  | 7.2  | 45 | 1211054 | <3.1 | <3.1 | <3.1 |
| 46 | 1250 | 7.5  | 7.1  | <3.1 | 46 | 1211055 | <3.1 | <3.1 | <3.1 |
| 47 | 1257 | <3.1 | <3.1 | <3.1 | 47 | 1211057 | 3.3  | 4    | <3.1 |
| 48 | 1261 | <3.1 | <3.1 | <3.1 | 48 | 1211058 | <3.1 | <3.1 | <3.1 |
| 49 | 1267 | <3.1 | <3.1 | <3.1 | 49 | 1211059 | <3.1 | <3.1 | <3.1 |
| 50 | 1276 | 4.9  | 4.2  | 4    | 50 | 1211060 | <3.1 | <3.1 | <3.1 |
| 51 | 1278 | <3.1 | <3.1 | <3.1 | 51 | 1211061 | <3.1 | <3.1 | <3.1 |
| 52 | 1280 | 8.1  | 7.6  | <3.1 | 52 | 1211062 | <3.1 | 3.2  | <3.1 |
| 53 | 1287 | <3.1 | <3.1 | <3.1 | 53 | 1211064 | <3.1 | <3.1 | <3.1 |

|    |      |      |      |      |    |         |      |      |      |
|----|------|------|------|------|----|---------|------|------|------|
| 54 | 1290 | 7.3  | 6.7  | <3.1 | 54 | 1211066 | <3.1 | <3.1 | <3.1 |
| 55 | 1291 | <3.1 | <3.1 | <3.1 | 55 | 1211067 | 3.7  | 4    | <3.1 |
| 56 | 1292 | <3.1 | <3.1 | <3.1 | 56 | 1211068 | <3.1 | <3.1 | <3.1 |
| 57 | 1301 | <3.1 | <3.1 | <3.1 | 57 | 1211069 | <3.1 | <3.1 | <3.1 |
| 58 | 1302 | 4.6  | 4.1  | <3.1 | 58 | 1211072 | 3.8  | 4.1  | <3.1 |
| 59 | 1308 | 5.9  | 5.2  | <3.1 | 59 | 1211073 | 4.4  | 5    | <3.1 |
| 60 | 1311 | <3.1 | <3.1 | <3.1 | 60 | 1211074 | 3.3  | 4    | <3.1 |
| 61 | 1312 | <3.1 | <3.1 | <3.1 | 61 | 1211075 | <3.1 | <3.1 | <3.1 |
| 62 | 1314 | <3.1 | <3.1 | <3.1 | 62 | 1211076 | 3.2  | 3.8  | <3.1 |
| 63 | 1316 | 6.7  | 6.4  | <3.1 | 63 | 1211077 | 3.3  | 3.5  | <3.1 |
| 64 | 1317 | <3.1 | <3.1 | <3.1 | 64 | 1211079 | <3.1 | <3.1 | <3.1 |
| 65 | 1324 | 5.8  | 5.2  | <3.1 | 65 | 1211080 | <3.1 | <3.1 | <3.1 |
| 66 | 1325 | 3.7  | 3.3  | 4.8  | 66 | 1211082 | <3.1 | <3.1 | <3.1 |
| 67 | 1326 | <3.1 | <3.1 | <3.1 | 67 | 1211083 | <3.1 | <3.1 | <3.1 |
| 68 | 1332 | <3.1 | <3.1 | <3.1 | 68 | 1211085 | 7.1  | 6.6  | <3.1 |
| 69 | 1334 | 5.8  | 5.6  | <3.1 | 69 | 1211086 | <3.1 | <3.1 | <3.1 |
| 70 | 1335 | <3.1 | <3.1 | <3.1 | 70 | 1211087 | <3.1 | <3.1 | <3.1 |
| 71 | 1336 | <3.1 | <3.1 | <3.1 | 71 | 1211088 | <3.1 | <3.1 | <3.1 |
| 72 | 1338 | 4.6  | 4.4  | <3.1 | 72 | 1211089 | <3.1 | <3.1 | <3.1 |
| 73 | 1339 | 6.5  | 6.2  | <3.1 | 73 | 1211091 | <3.1 | <3.1 | <3.1 |
| 74 | 1341 | <3.1 | <3.1 | <3.1 | 74 | 1211092 | <3.1 | <3.1 | <3.1 |
| 75 | 1342 | <3.1 | <3.1 | <3.1 | 75 | 1211093 | 6.7  | 6.3  | <3.1 |
| 76 | 1343 | 7.3  | 7.1  | <3.1 | 76 | 1211094 | <3.1 | <3.1 | <3.1 |
| 77 | 1345 | <3.1 | <3.1 | <3.1 | 77 | 1211095 | <3.1 | <3.1 | <3.1 |
| 78 | 1347 | 6.8  | 6.3  | 7.3  | 78 | 1211096 | 4.5  | 4.1  | <3.1 |
| 79 | 1349 | <3.1 | <3.1 | <3.1 | 79 | 2111001 | <3.1 | <3.1 | <3.1 |
| 80 | 1350 | <3.1 | <3.1 | <3.1 | 80 | 2111002 | <3.1 | <3.1 | <3.1 |
| 81 | 1352 | <3.1 | <3.1 | <3.1 | 81 | 2111003 | <3.1 | <3.1 | <3.1 |
| 82 | 1356 | <3.1 | <3.1 | <3.1 | 82 | 2111036 | <3.1 | <3.1 | <3.1 |
| 83 | 1357 | <3.1 | <3.1 | <3.1 | 83 | 2111038 | <3.1 | <3.1 | <3.1 |
| 84 | 1360 | <3.1 | <3.1 | <3.1 | 84 | 2111040 | <3.1 | <3.1 | <3.1 |
| 85 | 1362 | <3.1 | <3.1 | <3.1 | 85 | 2111041 | 5.0  | 4    | <3.1 |

|     |      |      |      |      |     |         |      |      |      |
|-----|------|------|------|------|-----|---------|------|------|------|
| 86  | 1363 | <3.1 | <3.1 | <3.1 | 86  | 2111042 | <3.1 | <3.1 | <3.1 |
| 87  | 1365 | <3.1 | <3.1 | <3.1 | 87  | 2111043 | 3.2  | 4    | <3.1 |
| 88  | 1366 | <3.1 | <3.1 | <3.1 | 88  | 2111045 | 5.4  | 5.6  | <3.1 |
| 89  | 1368 | <3.1 | <3.1 | <3.1 | 89  | 2111049 | <3.1 | 3.4  | <3.1 |
| 90  | 1369 | <3.1 | <3.1 | <3.1 | 90  | 2111050 | <3.1 | <3.1 | <3.1 |
| 91  | 1370 | <3.1 | <3.1 | <3.1 | 91  | 2111054 | <3.1 | <3.1 | <3.1 |
| 92  | 1372 | 6.9  | 6.6  | <3.1 | 92  | 2111056 | <3.1 | 7.9  | <3.1 |
| 93  | 1373 | <3.1 | <3.1 | <3.1 | 93  | 2111057 | <3.1 | <3.1 | <3.1 |
| 94  | 1374 | <3.1 | <3.1 | <3.1 | 94  | 2111060 | <3.1 | <3.1 | <3.1 |
| 95  | 1375 | 4.2  | 3.8  | 4.4  | 95  | 2111062 | <3.1 | <3.1 | <3.1 |
| 96  | 1376 | <3.1 | <3.1 | <3.1 | 96  | 2111063 | <3.1 | <3.1 | <3.1 |
| 97  | 1379 | <3.1 | <3.1 | <3.1 | 97  | 2111064 | 4.8  | 5    | <3.1 |
| 98  | 1382 | 6.7  | 6.3  | <3.1 | 98  | 2111066 | <3.1 | <3.1 | <3.1 |
| 99  | 1383 | <3.1 | <3.1 | <3.1 | 99  | 2111067 | <3.1 | <3.1 | <3.1 |
| 100 | 1386 | 3.0  | <3.1 | <3.1 | 100 | 2111068 | 8.1  | 8.2  | <3.1 |
| 101 | 1388 | 7.6  | 7.4  | <3.1 | 101 | 2111069 | <3.1 | <3.1 | <3.1 |
| 102 | 1391 | <3.1 | <3.1 | <3.1 | 102 | 2111070 | <3.1 | <3.1 | <3.1 |
| 103 | 1392 | <3.1 | <3.1 | <3.1 | 103 | 2111072 | <3.1 | <3.1 | <3.1 |
| 104 | 1393 | 4.9  | 4.3  | <3.1 | 104 | 2111073 | <3.1 | <3.1 | <3.1 |
| 105 | 1394 | 5.9  | 5.3  | <3.1 | 105 | 2111076 | 6.7  | 7.1  | <3.1 |
| 106 | 1396 | <3.1 | <3.1 | <3.1 | 106 | 2111077 | <3.1 | 3.4  | <3.1 |
| 107 | 1397 | 5.4  | 4.8  | <3.1 | 107 | 2111078 | <3.1 | <3.1 | <3.1 |
| 108 | 1399 | <3.1 | <3.1 | <3.1 | 108 | 2111079 | <3.1 | <3.1 | <3.1 |
| 109 | 1402 | 8.7  | 8.2  | <3.1 | 109 | 2111083 | 6.3  | 6.3  | <3.1 |
| 110 | 1404 | <3.1 | <3.1 | <3.1 | 110 | 2111084 | 6.0  | 6    | <3.1 |
| 111 | 1406 | <3.1 | <3.1 | <3.1 | 111 | 2111085 | 4.3  | 4.2  | <3.1 |
| 112 | 1407 | <3.1 | <3.1 | <3.1 | 112 | 2111086 | <3.1 | <3.1 | <3.1 |
| 113 | 1408 | <3.1 | <3.1 | <3.1 | 113 | 2111088 | 4.5  | 4.1  | <3.1 |
| 114 | 1409 | <3.1 | <3.1 | <3.1 | 114 | 2111089 | 4.1  | 4    | <3.1 |
| 115 | 1410 | <3.1 | <3.1 | <3.1 | 115 | 2111091 | <3.1 | <3.1 | <3.1 |
| 116 | 1411 | <3.1 | <3.1 | <3.1 | 116 | 2111093 | <3.1 | <3.1 | <3.1 |
| 117 | 1412 | <3.1 | <3.1 | <3.1 | 117 | 2111095 | <3.1 | <3.1 | <3.1 |

|              |      |          |          |          |     |         |      |      |      |
|--------------|------|----------|----------|----------|-----|---------|------|------|------|
| 118          | 1413 | <3.1     | <3.1     | <3.1     | 118 | 2111096 | <3.1 | <3.1 | <3.1 |
| 119          | 1414 | 7.5      | 6.7      | 7.4      | 119 | 2111097 | 6.3  | 6.4  | <3.1 |
| 120          | 1415 | 7.3      | 6.7      | <3.1     | 120 | 2111098 | 6.4  | 6.9  | 5.5  |
| 121          | 1417 | <3.1     | <3.1     | <3.1     | 121 | 2111101 | <3.1 | <3.1 | <3.1 |
| 122          | 1418 | <3.1     | <3.1     | <3.1     | 122 | 2111102 | <3.1 | <3.1 | <3.1 |
| 123          | 1419 | 7.9      | 7.4      | <3.1     | 123 | 2111103 | 4.4  | 4    | <3.1 |
| 124          | 1420 | 7.5      | 7.1      | <3.1     | 124 | 2111106 | 4.9  | 4.8  | <3.1 |
| Average      |      | 6.3      | 6.0      | 5.9      | 125 | 2111107 | <3.1 | <3.1 | <3.1 |
| Std. Dev.    |      | 1.4      | 1.5      | 1.9      | 126 | 2111108 | <3.1 | <3.1 | <3.1 |
| Det. rate, % |      | 35.5     | 35.5     | 9.7      | 127 | 2111109 | <3.1 | <3.1 | <3.1 |
|              |      | (44/124) | (44/124) | (12/124) | 128 | 2111110 | <3.1 | 4.3  | <3.1 |
|              |      |          |          |          | 129 | 2111111 | <3.1 | <3.1 | <3.1 |
|              |      |          |          |          | 130 | 1311001 | 3.5  | 4    | <3.1 |
|              |      |          |          |          | 131 | 1311002 | <3.1 | <3.1 | <3.1 |
|              |      |          |          |          | 132 | 1311003 | 5.6  | 6    | <3.1 |
|              |      |          |          |          | 133 | 1311005 | <3.1 | <3.1 | <3.1 |
|              |      |          |          |          | 134 | 1311006 | <3.1 | <3.1 | <3.1 |
|              |      |          |          |          | 135 | 1311007 | <3.1 | <3.1 | <3.1 |
|              |      |          |          |          | 136 | 1311011 | <3.1 | <3.1 | <3.1 |
|              |      |          |          |          | 137 | 1311014 | <3.1 | <3.1 | <3.1 |
|              |      |          |          |          | 138 | 1311016 | <3.1 | <3.1 | <3.1 |
|              |      |          |          |          | 139 | 1311017 | <3.1 | <3.1 | <3.1 |
|              |      |          |          |          | 140 | 1311018 | <3.1 | 3.8  | <3.1 |
|              |      |          |          |          | 141 | 1311019 | <3.1 | <3.1 | <3.1 |
|              |      |          |          |          | 142 | 1311023 | 6.0  | 6.4  | 3.9  |
|              |      |          |          |          | 143 | 1311025 | <3.1 | <3.1 | <3.1 |
|              |      |          |          |          | 144 | 1311026 | <3.1 | <3.1 | <3.1 |
|              |      |          |          |          | 145 | 1311027 | <3.1 | <3.1 | <3.1 |
|              |      |          |          |          | 146 | 1311028 | <3.1 | <3.1 | <3.1 |
|              |      |          |          |          | 147 | 1311031 | 4.6  | <3.1 | <3.1 |
|              |      |          |          |          | 148 | 1311033 | <3.1 | <3.1 | <3.1 |
|              |      |          |          |          | 149 | 1311035 | <3.1 | <3.1 | <3.1 |

|     |         |      |      |      |
|-----|---------|------|------|------|
| 150 | 1311036 | 6.9  | 6.3  | <3.1 |
| 151 | 1311037 | <3.1 | <3.1 | <3.1 |
| 152 | 1311038 | 5.1  | 5    | <3.1 |
| 153 | 1311039 | <3.1 | <3.1 | <3.1 |
| 154 | 1311040 | 5.6  | 5.9  | <3.1 |
| 155 | 1311044 | <3.1 | <3.1 | <3.1 |
| 156 | 1311045 | 3.7  | 4    | <3.1 |
| 157 | 1311046 | <3.1 | <3.1 | <3.1 |
| 158 | 1311047 | <3.1 | <3.1 | <3.1 |
| 159 | 1311048 | 3.4  | 3.2  | <3.1 |
| 160 | 1311049 | 3.6  | 4    | <3.1 |
| 161 | 1311051 | 5.4  | 6.3  | <3.1 |
| 162 | 1311053 | 5.2  | 4.9  | <3.1 |
| 163 | 1311054 | <3.1 | <3.1 | <3.1 |
| 164 | 1311056 | <3.1 | <3.1 | <3.1 |
| 165 | 1311058 | <3.1 | <3.1 | <3.1 |
| 166 | 1311059 | 5.9  | 5.8  | <3.1 |
| 167 | 1311060 | 3.2  | 5.2  | <3.1 |
| 168 | 1311065 | <3.1 | <3.1 | <3.1 |
| 169 | 1311066 | <3.1 | <3.1 | <3.1 |
| 170 | 1311068 | 4.0  | 3.6  | <3.1 |
| 171 | 1311069 | <3.1 | <3.1 | <3.1 |
| 172 | 1311070 | 5.7  | 5.7  | <3.1 |
| 173 | 1411001 | <3.1 | <3.1 | <3.1 |
| 174 | 1411002 | <3.1 | <3.1 | <3.1 |
| 175 | 1411003 | <3.1 | <3.1 | <3.1 |
| 176 | 1411004 | <3.1 | <3.1 | <3.1 |
| 177 | 1411009 | <3.1 | <3.1 | <3.1 |
| 178 | 1411010 | <3.1 | <3.1 | <3.1 |
| 179 | 1411011 | <3.1 | <3.1 | <3.1 |
| 180 | 1411013 | <3.1 | <3.1 | <3.1 |
| 181 | 1411014 | <3.1 | <3.1 | <3.1 |

|     |         |      |      |      |
|-----|---------|------|------|------|
| 182 | 1411017 | 5.0  | 5.0  | <3.1 |
| 183 | 1411018 | <3.1 | <3.1 | <3.1 |
| 184 | 1411019 | <3.1 | <3.1 | <3.1 |
| 185 | 1411021 | <3.1 | <3.1 | <3.1 |
| 186 | 1411023 | 4.4  | 4.2  | <3.1 |
| 187 | 1411024 | <3.1 | <3.1 | <3.1 |
| 188 | 1411025 | <3.1 | <3.1 | <3.1 |
| 189 | 1411026 | 4.3  | 4.7  | <3.1 |
| 190 | 1411027 | <3.1 | <3.1 | <3.1 |
| 191 | 1411028 | 5.2  | 5.2  | <3.1 |
| 192 | 1411029 | <3.1 | <3.1 | <3.1 |
| 193 | 1411030 | 5.5  | 5.5  | <3.1 |
| 194 | 1411031 | <3.1 | <3.1 | <3.1 |
| 195 | 1411033 | <3.1 | <3.1 | <3.1 |
| 196 | 1411036 | 4.6  | 4.7  | <3.1 |
| 197 | 1411037 | <3.1 | <3.1 | <3.1 |
| 198 | 1411038 | 4.3  | 4.4  | <3.1 |
| 199 | 1411041 | <3.1 | <3.1 | <3.1 |
| 200 | 1411043 | 5.3  | 5.3  | <3.1 |
| 201 | 1411046 | <3.1 | <3.1 | <3.1 |
| 202 | 1411047 | 4.9  | 4.8  | 5.1  |
| 203 | 1411048 | <3.1 | <3.1 | <3.1 |
| 204 | 1411049 | <3.1 | <3.1 | <3.1 |
| 205 | 1411051 | <3.1 | <3.1 | <3.1 |
| 206 | 1411052 | <3.1 | <3.1 | <3.1 |
| 207 | 1411054 | 4.9  | 4.8  | <3.1 |
| 208 | 1411055 | 4.1  | 4.1  | <3.1 |
| 209 | 1411056 | 4.5  | 5    | <3.1 |
| 210 | 1411057 | <3.1 | <3.1 | <3.1 |
| 211 | 1411058 | <3.1 | <3.1 | <3.1 |
| 212 | 1411059 | 5.8  | 5.7  | <3.1 |
| 213 | 1411060 | 4.0  | 4.2  | <3.1 |

|              |         |          |          |         |
|--------------|---------|----------|----------|---------|
| 214          | 1411061 | 5.4      | 5.5      | <3.1    |
| 215          | 1411063 | <3.1     | <3.1     | <3.1    |
| 216          | 1411064 | <3.1     | <3.1     | <3.1    |
| 217          | 1411065 | <3.1     | <3.1     | <3.1    |
| 218          | 1411066 | <3.1     | <3.1     | <3.1    |
| 219          | 1411067 | <3.1     | <3.1     | <3.1    |
| 220          | 1411068 | 6.0      | 6.2      | <3.1    |
| 221          | 1411069 | <3.1     | <3.1     | <3.1    |
| Average      |         | 4.8      | 4.8      | 4.8     |
| Std. Dev.    |         | 1.1      | 1.2      | 0.8     |
| Det. rate, % |         | 29.0     | 31.7     | 1.4     |
|              |         | (64/221) | (70/221) | (3/221) |
